# Supplementary material for: Access to primary healthcare during lockdown measures for COVID-19 in rural South Africa: a longitudinal cohort study
Source: PubMed Central journal article supplement — medRxiv. 2020 May 20:2020.05.15.20103226. Preprint. [Version 1] doi: 10.1101/2020.05.15.20103226 (PMC7273272; doi:10.1101/2020.05.15.20103226), 2020-05-20
Supplement: NIHPP2020.05.15.20103226-supplement-1.pdf [file NIHPP2020.05.15.20103226-supplement-1.pdf]

**Supplemental Table 3.** Sensitivity analyses, demonstrating results of the main regression model and alternate models including a mixed effects regression model with random slopes, and linear and Poisson generalized estimating equations models.

| <b>Model</b>             | <b>Mean daily clinic visits per clinic during pre-lockdown period</b> | <b>Change in daily clinic visits per week during pre-lockdown period</b> | <b><i>P</i>-value</b> | <b>Mean change in clinic visits per day immediately after the lockdown implementation</b> | <b><i>P</i>-value</b> | <b>Change in daily clinic visits per week during post-lockdown period</b> | <b><i>P</i>-value</b> |
|--------------------------|-----------------------------------------------------------------------|--------------------------------------------------------------------------|-----------------------|-------------------------------------------------------------------------------------------|-----------------------|---------------------------------------------------------------------------|-----------------------|
| Primary model            | 89.2 (65.5, 112.9)                                                    | -0.6 (-1.8, 0.6)                                                         | 0.31                  | -6.9 (-17.4, 3.7)                                                                         | 0.20                  | -0.2 (-3.4, 3.1)                                                          | 0.90                  |
| Random slopes            | 89.3 (66.0, 112.5)                                                    | -0.6 (-1.9, 0.7)                                                         | 0.38                  | -6.9 (-17.4, 3.5)                                                                         | 0.19                  | -0.2 (-3.4, 3.1)                                                          | 0.89                  |
| Linear GEE               | 89.2 (66.9, 111.5)                                                    | -0.6 (-1.8, 0.6)                                                         | 0.31                  | -6.9 (-17.5, 3.8)                                                                         | 0.21                  | -0.2 (-3.5, 3.1)                                                          | 0.90                  |
| Poisson GEE <sup>b</sup> | 89.2 (84.8, 93.8)                                                     | 1.0 (0.9, 1.0)                                                           | <0.001                | 0.9 (0.9, 0.9)                                                                            | <0.001                | 1.0 (0.9, 1.0)                                                            | 0.30                  |

GEE: generalized estimating equations

<sup>a</sup>Random slopes model is a linear mixed effects regression model with random intercept by clinic and random slope by time

<sup>b</sup>Poisson GEE results are presented as exponentiated coefficients, so they represent proportional rather than absolute changes in counts.
